# Supplementary material for: Incidence of Multisystem Inflammatory Syndrome in Children Among US Persons Infected With SARS-CoV-2
Source: PubMed Central journal article supplement (PMC8193431; doi:10.1001/jamanetworkopen.2021.16420), 2021-06-10
Supplement: jamanetwopen-e2116420-s001.pdf [file jamanetwopen-e2116420-s001.pdf]

## Supplemental Online Content

Payne AB, Gilani Z, Godfred-Cato S, et al; MIS-C Incidence Authorship Group. Incidence of multisystem inflammatory syndrome in children among US persons infected with SARS-CoV-2. *JAMA Netw Open*. 2021;4(6):e2116420. doi:10.1001/jamanetworkopen.2021.16420

**eAppendix 1.** CDC's National Surveillance Case Report Form

**eAppendix 2.** Overcoming COVID-19 Surveillance Registry Case Report Form, Section 1 and 2: Case Definition and Demographic Characteristics

**eTable 1.** Multipliers Used to Estimate Number of SARS-CoV-2 Infections Based on Reported Persons With COVID-19

**eFigure 1.** Distribution of Reported Persons With COVID-19 in Select Jurisdictions by Month During March to May 2020

**eFigure 2.** Distribution of Reported Persons With MIS-C in Jurisdictions by Select Characteristics During April to June 2020

**eTable 2.** Range of Stratum-Specific Estimates of Incidence of MIS-C per 1 000 000 SARS-CoV-2 Infections in Select Jurisdictions by Jurisdiction, Race/Ethnicity, Sex, and Age Group During April to June 2020

This supplemental material has been provided by the authors to give readers additional information about their work.

eAppendix 1. CDC's National Surveillance Case Report Form<sup>20</sup>

U.S. DEPARTMENT OF  
HEALTH AND HUMAN SERVICES  
CENTERS FOR DISEASE CONTROL  
AND PREVENTION  
ATLANTA, GA 30329

**Multisystem Inflammatory Syndrome Associated  
with COVID-19 Case Report Form**

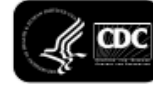

**MIS ID (REQUIRED):** \_\_\_\_\_ **Health Department ID:** \_\_\_\_\_ **NCOV ID (if available):** \_\_\_\_\_

**NNDSS ID (local\_record\_id/case\_id):** \_\_\_\_\_ **Tools for CRF data submission to supplement NNDSS case notification/data:**  DCIPHER  RedCap

**Abstractor name:** \_\_\_\_\_ **Date of abstraction:** \_\_\_\_/\_\_\_\_/\_\_\_\_

**SECTION 1 – INCLUSION CRITERIA**

- 1.1  Age <21, AND
- 1.2  Fever >38.0°C for ≥24 hours, or report of subjective fever lasting ≥24 hours, AND
- 1.3  Laboratory markers of inflammation (including, but not limited to one or more; an elevated C-reactive protein (CRP), erythrocyte sedimentation rate (ESR), fibrinogen, procalcitonin, d-dimer, ferritin, lactic acid dehydrogenase (LDH), or interleukin 6 (IL-6), elevated neutrophils, reduced lymphocytes and low albumin, AND
- 1.4  Evidence of clinically severe illness requiring hospitalization, with multisystem (≥2) organ involvement (*check all applicable below*): AND
  - 1.4.1  Cardiac (e.g. shock, elevated troponin, BNP, abnormal echocardiogram, arrhythmia)
  - 1.4.2  Renal (e.g. acute kidney injury or renal failure)
  - 1.4.3  Respiratory (e.g. pneumonia, ARDS, pulmonary embolism)
  - 1.4.4  Hematologic (e.g. elevated D-dimers, thrombophilia, or thrombocytopenia)
  - 1.4.5  Gastrointestinal (e.g. elevated bilirubin, elevated liver enzymes, or diarrhea)
  - 1.4.6  Dermatologic, (e.g. rash, mucocutaneous lesions)
  - 1.4.7  Neurological, (e.g. CVA, aseptic meningitis, encephalopathy)
- 1.5  No alternative plausible diagnosis; AND
- 1.6  Positive for current or recent SARS-COV-2 infection by (check all applicable below): OR
  - 1.6.1  RT-PCR
  - 1.6.2  Serology
  - 1.6.3  Antigen test
- 1.7  COVID-19 exposure within the 4 weeks prior to the onset of symptoms
  - 1.7.1 If yes, date of first exposure within the 4 weeks prior : (MM/DD/YYYY): \_\_\_\_/\_\_\_\_/\_\_\_\_  Unknown

**SECTION 2 – PATIENT DEMOGRAPHICS**

- 2.1 **State of Residence:** \_\_\_\_\_
  - 2.2 **Patient zip code/postal code (primary residence):** \_\_\_\_\_
  - 2.3 **Date of birth (MM/DD/YYYY):** \_\_\_\_/\_\_\_\_/\_\_\_\_
  - 2.4 **Sex:**  Male  Female
  - 2.5 **Ethnicity:**  Hispanic or Latino  Not Hispanic or Latino  Refused or Unknown
  - 2.6 **Race (mark all that apply, selecting more than one option as necessary):**
    - 2.6.1  White
    - 2.6.2  Black or African American
    - 2.6.3  American Indian
    - 2.6.4  Alaska Native or Aboriginal Canadian
    - 2.6.5  Native Hawaiian
    - 2.6.6  Other Pacific Islander
    - 2.6.7  Asian
    - 2.6.8  Other
    - 2.6.9  Refused or Don't know
  - 2.7 **Height:** \_\_\_\_\_ inches
  - 2.8 **Weight:** \_\_\_\_\_ lbs
  - 2.9 **BMI:** \_\_\_\_\_
- Comorbidities:**
- |                                              |                                                    |                                                                                                                               |
|----------------------------------------------|----------------------------------------------------|-------------------------------------------------------------------------------------------------------------------------------|
| 2.10.1 Immunosuppressive disorder/malignancy | <input type="radio"/> Yes <input type="radio"/> No | 2.11 Hospital admission date                                                                                                  |
| 2.10.2 Obesity                               | <input type="radio"/> Yes <input type="radio"/> No | (MM/DD/YYYY): ____/____/____                                                                                                  |
| 2.10.3 Type 1 diabetes                       | <input type="radio"/> Yes <input type="radio"/> No | 2.11.1 Number of days in the hospital: _____                                                                                  |
| 2.10.4 Type 2 diabetes                       | <input type="radio"/> Yes <input type="radio"/> No | 2.12 If admitted to the ICU, admission date                                                                                   |
| 2.10.5 Seizures                              | <input type="radio"/> Yes <input type="radio"/> No | (MM/DD/YYYY): ____/____/____                                                                                                  |
| 2.10.6 Congenital heart disease              | <input type="radio"/> Yes <input type="radio"/> No | 2.12.1 Number of days in the ICU: _____                                                                                       |
| 2.10.7 Sickle cell disease                   | <input type="radio"/> Yes <input type="radio"/> No | 2.13 <b>Patient outcome:</b> <input type="radio"/> Died <input type="radio"/> Discharged <input type="radio"/> Still admitted |
| 2.10.8 Chronic lung disease                  | <input type="radio"/> Yes <input type="radio"/> No | 2.13.2 Hospital discharge or death date                                                                                       |
| 2.10.9 Other congenital malformations        | <input type="radio"/> Yes <input type="radio"/> No | (MM/DD/YYYY): ____/____/____                                                                                                  |
| 2.10.10 Other (specify): _____               |                                                    |                                                                                                                               |

| SECTION 3 – CLINICAL SIGNS AND SYMPTOMS          |                                                                                                 |                           |                          |
|--------------------------------------------------|-------------------------------------------------------------------------------------------------|---------------------------|--------------------------|
| 3.1                                              | Did the patient have preceding COVID-like illness?                                              | <input type="radio"/> Yes | <input type="radio"/> No |
| 3.1.1                                            | Date of symptom onset (MM/DD/YYYY):                                                             | ___/___/___               |                          |
| 3.2                                              | Date of symptom onset of MIS (MM/DD/YYYY):                                                      | ___/___/___               |                          |
| 3.3                                              | Fever ≥ 38.0°C:                                                                                 | <input type="radio"/> Yes | <input type="radio"/> No |
| 3.3.1                                            | Date of fever onset (MM/DD/YYYY):                                                               | ___/___/___               |                          |
| 3.3.2                                            | Highest Temperature:                                                                            | ___ °C                    |                          |
| 3.3.3                                            | Number of days febrile:                                                                         | ___                       |                          |
| Signs and symptoms <i>during present illness</i> |                                                                                                 |                           |                          |
| 3.4.1                                            | <b>Cardiac</b>                                                                                  |                           |                          |
| 3.4.1.1                                          | Shock                                                                                           | <input type="radio"/> Yes | <input type="radio"/> No |
| 3.4.1.2                                          | Elevated troponin                                                                               | <input type="radio"/> Yes | <input type="radio"/> No |
| 3.4.1.3                                          | Elevated BNP or NT-proBNP                                                                       | <input type="radio"/> Yes | <input type="radio"/> No |
| 3.4.2                                            | <b>Renal</b>                                                                                    |                           |                          |
| 3.4.2.1                                          | Acute kidney injury                                                                             | <input type="radio"/> Yes | <input type="radio"/> No |
| 3.4.2.2                                          | Renal failure                                                                                   | <input type="radio"/> Yes | <input type="radio"/> No |
| 3.4.3                                            | <b>Respiratory</b>                                                                              |                           |                          |
| 3.4.3.1                                          | Cough                                                                                           | <input type="radio"/> Yes | <input type="radio"/> No |
| 3.4.3.2                                          | Shortness of breath                                                                             | <input type="radio"/> Yes | <input type="radio"/> No |
| 3.4.3.3                                          | Chest pain/tightness                                                                            | <input type="radio"/> Yes | <input type="radio"/> No |
| 3.4.3.4                                          | Pneumonia                                                                                       | <input type="radio"/> Yes | <input type="radio"/> No |
| 3.4.3.5                                          | ARDS                                                                                            | <input type="radio"/> Yes | <input type="radio"/> No |
| 3.4.3.6                                          | Pulmonary embolism                                                                              | <input type="radio"/> Yes | <input type="radio"/> No |
| 3.4.4                                            | <b>Hematologic</b>                                                                              |                           |                          |
| 3.4.4.1                                          | Elevated D-dimers                                                                               | <input type="radio"/> Yes | <input type="radio"/> No |
| 3.4.4.2                                          | Thrombophilia                                                                                   | <input type="radio"/> Yes | <input type="radio"/> No |
| 3.4.4.3                                          | Thrombocytopenia                                                                                | <input type="radio"/> Yes | <input type="radio"/> No |
| 3.4.5                                            | <b>Gastrointestinal</b>                                                                         |                           |                          |
| 3.4.5.1                                          | Abdominal pain                                                                                  | <input type="radio"/> Yes | <input type="radio"/> No |
| 3.4.5.2                                          | Vomiting                                                                                        | <input type="radio"/> Yes | <input type="radio"/> No |
| 3.4.5.3                                          | Diarrhea                                                                                        | <input type="radio"/> Yes | <input type="radio"/> No |
| 3.4.5.4                                          | Elevated bilirubin                                                                              | <input type="radio"/> Yes | <input type="radio"/> No |
| 3.4.5.5                                          | Elevated liver enzymes                                                                          | <input type="radio"/> Yes | <input type="radio"/> No |
| 3.4.6                                            | <b>Dermatologic</b>                                                                             |                           |                          |
| 3.4.6.1                                          | Rash                                                                                            | <input type="radio"/> Yes | <input type="radio"/> No |
| 3.4.6.2                                          | Mucocutaneous lesions                                                                           | <input type="radio"/> Yes | <input type="radio"/> No |
| 3.4.7                                            | <b>Neurological</b>                                                                             |                           |                          |
| 3.4.7.1                                          | Headache                                                                                        | <input type="radio"/> Yes | <input type="radio"/> No |
| 3.4.7.2                                          | Altered mental state                                                                            | <input type="radio"/> Yes | <input type="radio"/> No |
| 3.4.7.3                                          | Syncope/near syncope                                                                            | <input type="radio"/> Yes | <input type="radio"/> No |
| 3.4.7.5                                          | Meningitis                                                                                      | <input type="radio"/> Yes | <input type="radio"/> No |
| 3.4.7.6                                          | Encephalopathy                                                                                  | <input type="radio"/> Yes | <input type="radio"/> No |
| 3.4.8                                            | <b>Other</b>                                                                                    |                           |                          |
| 3.4.8.1                                          | Neck pain                                                                                       | <input type="radio"/> Yes | <input type="radio"/> No |
| 3.4.8.2                                          | Myalgia                                                                                         | <input type="radio"/> Yes | <input type="radio"/> No |
| 3.4.8.3                                          | Conjunctival injection                                                                          | <input type="radio"/> Yes | <input type="radio"/> No |
| 3.4.8.4                                          | Periorbital edema                                                                               | <input type="radio"/> Yes | <input type="radio"/> No |
| 3.4.8.5                                          | Cervical lymphadenopathy >1.5 cm diameter                                                       | <input type="radio"/> Yes | <input type="radio"/> No |
| SECTION 4 – COMPLICATIONS                        |                                                                                                 |                           |                          |
| 4.1                                              | <b>Arrhythmia</b>                                                                               | <input type="radio"/> Yes | <input type="radio"/> No |
|                                                  | If yes:                                                                                         |                           |                          |
| 4.1.1                                            | Ventricular arrhythmia:                                                                         | <input type="radio"/> Yes | <input type="radio"/> No |
| 4.1.2                                            | Supraventricular arrhythmia:                                                                    | <input type="radio"/> Yes | <input type="radio"/> No |
| 4.1.3                                            | Other arrhythmia (specify):                                                                     | <input type="radio"/> Yes | <input type="radio"/> No |
|                                                  | _____                                                                                           |                           |                          |
| 4.2                                              | Congestive heart failure                                                                        | <input type="radio"/> Yes | <input type="radio"/> No |
| 4.3                                              | Myocarditis                                                                                     | <input type="radio"/> Yes | <input type="radio"/> No |
| 4.4                                              | Pericarditis                                                                                    | <input type="radio"/> Yes | <input type="radio"/> No |
| 4.5                                              | Liver failure                                                                                   | <input type="radio"/> Yes | <input type="radio"/> No |
| 4.6                                              | Deep vein thrombosis or PE                                                                      | <input type="radio"/> Yes | <input type="radio"/> No |
| 4.7                                              | ARDS                                                                                            | <input type="radio"/> Yes | <input type="radio"/> No |
| 4.8                                              | Pneumonia                                                                                       | <input type="radio"/> Yes | <input type="radio"/> No |
| 4.9                                              | CVA or stroke                                                                                   | <input type="radio"/> Yes | <input type="radio"/> No |
| 4.10                                             | Encephalitis or aseptic meningitis                                                              | <input type="radio"/> Yes | <input type="radio"/> No |
| 4.11                                             | Shock                                                                                           | <input type="radio"/> Yes | <input type="radio"/> No |
| 4.12                                             | Hypotension                                                                                     | <input type="radio"/> Yes | <input type="radio"/> No |
| SECTION 5 – TREATMENTS                           |                                                                                                 |                           |                          |
| 5.1                                              | Low flow nasal cannula                                                                          | <input type="radio"/> Yes | <input type="radio"/> No |
| 5.2                                              | High flow nasal cannula                                                                         | <input type="radio"/> Yes | <input type="radio"/> No |
| 5.3                                              | Non-invasive ventilation                                                                        | <input type="radio"/> Yes | <input type="radio"/> No |
| 5.4                                              | Intubation                                                                                      | <input type="radio"/> Yes | <input type="radio"/> No |
| 5.5                                              | Mechanical ventilation                                                                          | <input type="radio"/> Yes | <input type="radio"/> No |
| 5.6                                              | ECMO                                                                                            | <input type="radio"/> Yes | <input type="radio"/> No |
| 5.7                                              | Vasoactive medications (e.g. epinephrine, milrinone, norepinephrine, or vasopressin) (specify): | <input type="radio"/> Yes | <input type="radio"/> No |
|                                                  | _____                                                                                           |                           |                          |
| 5.8                                              | Steroids                                                                                        | <input type="radio"/> Yes | <input type="radio"/> No |
| 5.9                                              | Immune modulators (e.g. anakinra, tocilizumab) (specify):                                       | <input type="radio"/> Yes | <input type="radio"/> No |
|                                                  | _____                                                                                           |                           |                          |
| 5.10                                             | Antiplatelets (e.g. aspirin, clopidogrel) (specify):                                            | <input type="radio"/> Yes | <input type="radio"/> No |
|                                                  | _____                                                                                           |                           |                          |
| 5.11                                             | Anticoagulation (e.g. heparin, enoxaparin, warfarin) (specify):                                 | <input type="radio"/> Yes | <input type="radio"/> No |
|                                                  | _____                                                                                           |                           |                          |
| 5.12                                             | Dialysis                                                                                        | <input type="radio"/> Yes | <input type="radio"/> No |
| 5.13                                             | First IVIG                                                                                      | <input type="radio"/> Yes | <input type="radio"/> No |
| 5.14                                             | Second IVIG                                                                                     | <input type="radio"/> Yes | <input type="radio"/> No |

**SECTION 6 – STUDIES**

**6.1 Blood Test Results**

- 6.1.1 Fibrinogen Highest value: \_\_\_\_\_ units: \_\_\_\_\_  Low  Normal  High
- 6.1.2 CRP Highest value: \_\_\_\_\_ units: \_\_\_\_\_  Low  Normal  High
- 6.1.3 Ferritin Highest value: \_\_\_\_\_ units: \_\_\_\_\_  Low  Normal  High
- 6.1.4 Troponin Highest value: \_\_\_\_\_ units: \_\_\_\_\_  Low  Normal  High
- 6.1.5 BNP Highest value: \_\_\_\_\_ units: \_\_\_\_\_  Low  Normal  High
- 6.1.6 NT-proBNP Highest value: \_\_\_\_\_ units: \_\_\_\_\_  Low  Normal  High
- 6.1.7 D-dimer Highest value: \_\_\_\_\_ units: \_\_\_\_\_  Low  Normal  High
- 6.1.8 IL-6 Highest value: \_\_\_\_\_ units: \_\_\_\_\_  Low  Normal  High
- 6.1.9 Serum White blood count Highest value: \_\_\_\_\_ Lowest value : \_\_\_\_\_ units: \_\_\_\_\_
- 6.1.10 Platelets Highest value : \_\_\_\_\_ Lowest value : \_\_\_\_\_ units: \_\_\_\_\_
- 6.1.11 Neutrophils Highest value: \_\_\_\_\_ Lowest value : \_\_\_\_\_ units: \_\_\_\_\_
- 6.1.12 Lymphocytes Highest value: \_\_\_\_\_ Lowest value : \_\_\_\_\_ units: \_\_\_\_\_
- 6.1.13 Bands Highest value: \_\_\_\_\_ Lowest value : \_\_\_\_\_ units: \_\_\_\_\_

**6.2 CSF Studies**

- 6.2.1 White blood count Highest value : \_\_\_\_\_ Lowest value : \_\_\_\_\_ units: \_\_\_\_\_
- 6.2.2 Protein Highest value : \_\_\_\_\_ Lowest value : \_\_\_\_\_ units: \_\_\_\_\_
- 6.2.3 Glucose Highest value : \_\_\_\_\_ Lowest value : \_\_\_\_\_ units: \_\_\_\_\_

**6.3 Urinalysis**

- 6.3.1 Urine White blood count Highest value : \_\_\_\_\_ Lowest value : \_\_\_\_\_ units: \_\_\_\_\_

**6.4 Echocardiogram (check if seen on ANY echocardiogram)**

- 6.4.1  Not done
- 6.4.2  Normal results
- 6.4.3  Coronary artery aneurysms
  - 6.4.3.1 Max coronary artery Z-score: \_\_\_\_\_
- 6.4.4  Coronary artery dilatation
- 6.4.5  Cardiac dysfunction (decreased function), specify type:
  - 6.4.5.1  left ventricular dysfunction
  - 6.4.5.2  right ventricular dysfunction
- 6.4.6  Pericardial effusion
- 6.4.7  Pleural effusion
- 6.4.8  Mitral regurgitation, specify type:  mild  moderate  severe
- 6.4.9  Other (specify): \_\_\_\_\_

**6.5 Date of first test showing coronary artery aneurysm or dilatation (MM/DD/YYYY): \_\_\_/\_\_\_/\_\_\_**

**6.6 Abdominal imaging**  Ultrasound  CT  Not done

- 6.6.1  Normal
- 6.6.2  Mesenteric lymphadenopathy
- 6.6.3  Free fluid
- 6.6.4  Other (specify): \_\_\_\_\_

**6.7 Chest imaging**  Chest x-ray  CT  Not done

- 6.7.1  Normal
- 6.7.2  Pneumonia
- 6.7.3  Atelectasis
- 6.7.4  Pleural effusion
- 6.7.5  Other (specify): \_\_\_\_\_

**SARS-COV-2 testing**

- 6.8 **RT-PCR:**  Positive  Negative  Not done
  - 6.8.1 If performed, date (MM/DD/YYYY): \_\_\_/\_\_\_/\_\_\_
- 6.9 **Antigen:**  Positive  Negative  Not done
  - 6.9.1 If performed, date (MM/DD/YYYY): \_\_\_/\_\_\_/\_\_\_
- 6.10 **IgG:**  Positive  Negative  Not done
  - 6.10.1 If performed, date (MM/DD/YYYY): \_\_\_/\_\_\_/\_\_\_
- 6.11 **IgM:**  Positive  Negative  Not done
  - 6.11.1 If performed, date (MM/DD/YYYY): \_\_\_/\_\_\_/\_\_\_
- 6.12 **IgA:**  Positive  Negative  Not done
  - 6.12.1 If performed, date (MM/DD/YYYY): \_\_\_/\_\_\_/\_\_\_

**eAppendix 2.** Overcoming COVID-19 Surveillance Registry Case Report Form, Section 1 and 2: Case Definition and Demographic Characteristics

Case Report Form (CRF)

Subject ID COVR -    -

**SECTION 1 CASE DEFINITION**  
**(for each surveillance time period)**

**Case Definition Through May 31<sup>st</sup>, 2020**

Inclusion Criteria

- Hospitalization at a participating site in a pediatric unit
- < 25 years old
- Disease is suspected of being related to SARS-CoV-2:
  - SARS-CoV-2 positive PCR AND/OR
  - SARS-CoV-2 positive antibody test AND/OR
  - Meets MIS-C criteria (see below) and hospitalized March 15<sup>th</sup> - May 31<sup>st</sup>, 2020

Exclusion Criteria

Not hospitalized OR >25 years old OR no suspected association with SARS-CoV-2

**Multisystem Inflammatory Syndrome in Children (MIS-C) Criteria**

Inclusion Criteria (must have all 3)

- Fever  $\geq 38$  °C (100.4 °F) for  $\geq 24$  hours, or report of subjective fever lasting  $\geq 24$  hours, **AND**
- Laboratory markers of inflammation (including but not limited to one or more of the following: elevated C-reactive protein (CRP), erythrocyte sedimentation rate (ESR), fibrinogen, procalcitonin, d-dimer, ferritin, lactic acid dehydrogenase (LDH), or interleukin 6 (IL-6), elevated neutrophils, reduced lymphocytes and low albumin), **AND**
- Clinical evidence of severe hospitalized illness including multi-organ ( $\geq 2$ ) involvement based on clinical judgement from record review, discharge diagnosis, laboratory or diagnostic tests:
  - Cardiac (e.g. shock, elevated troponin, BNP, abnormal echocardiogram, arrhythmia)
  - Respiratory (e.g. pneumonia, ARDS, pulmonary embolism)
  - Renal (e.g. acute kidney injury or renal failure)
  - Gastrointestinal (e.g. abdominal pain, vomiting, diarrhea, elevated bilirubin, or elevated liver enzymes)
  - Neurologic, (e.g. CVA, aseptic meningitis, encephalopathy)
  - Hematologic (e.g. elevated D-dimers, thrombophilia, or thrombocytopenia)
  - Dermatologic (e.g. rash, erythema, peeling)
  - Fulfill full or partial criteria for complete or incomplete Kawasaki disease
  - Other (specify): \_\_\_\_\_

Exclusion criteria: Other likely microbial or other cause, including bacterial sepsis, staphylococcal or streptococcal shock syndromes.

**Case Definition June 1, 2020 through August 12, 2020**

Inclusion Criteria

- Hospitalization at a participating site in a pediatric unit
- $\leq 21$  years old
- SARS-CoV-2 positive PCR or SARS-CoV-2 positive antibody test
- Symptoms of COVID-19 or MIS-C that prompted test (not done as a screening test for an elective procedure or visit)

Exclusion Criteria

- Negative (PCR and antibody) or no testing for SARS-CoV-2 (COVID-19)

**Case Definition August 13, 2020 forward**

Inclusion Criteria

- Hospitalization at a participating site in a pediatric unit
- < 21 years old (exclude if 21 years on admit)
- SARS-CoV-2 PCR, antigen, or antibody positive
- Meets one or more of the following:
  - Admitted to the ICU or stepdown unit for COVID-related complications AND/OR
  - Meets CDC criteria for MIS-C (see above)

Exclusion Criteria

- Negative (PCR, antigen, and antibody) or no testing for SARS-CoV-2 (COVID-19)

**SECTION 2 PATIENT DEMOGRAPHICS**

2.1 Date of birth (MM/DD/YYYY): \_\_\_/\_\_\_/\_\_\_\_\_

2.2 Is patient &lt;1 year of age on admission?

 Yes  No

2.2.1 If yes, born prematurely? (Born before 37 weeks of gestation)

 No  
 Unknown  
 Yes:

2.2.1.1 Number of weeks of gestation at birth: \_\_\_\_\_ weeks

2.2.1.2 Corrected gestational age at time of illness: \_\_\_\_\_ weeks

2.3 Gender:

 Male  
 Female

2.4 Ethnicity:

 Hispanic or Latino  
 Not Hispanic or Latino  
 Refused or Unknown

2.5 Race (mark all that apply, selecting more than one option as necessary):

|       |                                                                       |                              |                             |
|-------|-----------------------------------------------------------------------|------------------------------|-----------------------------|
| 2.5.1 | White or White-Hispanic                                               | <input type="checkbox"/> Yes | <input type="checkbox"/> No |
| 2.5.2 | Black or African American or Black-Hispanic                           | <input type="checkbox"/> Yes | <input type="checkbox"/> No |
| 2.5.3 | American Indian                                                       | <input type="checkbox"/> Yes | <input type="checkbox"/> No |
| 2.5.4 | Alaska Native or Aboriginal Canadian                                  | <input type="checkbox"/> Yes | <input type="checkbox"/> No |
| 2.5.5 | Native Hawaiian                                                       | <input type="checkbox"/> Yes | <input type="checkbox"/> No |
| 2.5.6 | Other Pacific Islander                                                | <input type="checkbox"/> Yes | <input type="checkbox"/> No |
| 2.5.7 | Asian (Asian Indian, Chinese, Filipino, Japanese, Korean, Vietnamese) | <input type="checkbox"/> Yes | <input type="checkbox"/> No |
| 2.5.8 | Other                                                                 | <input type="checkbox"/> Yes | <input type="checkbox"/> No |
|       | 2.5.8.1 Please list: _____                                            |                              |                             |
| 2.5.9 | Refused or Don't know                                                 | <input type="checkbox"/> Yes | <input type="checkbox"/> No |

2.6 First 4 digits of patient zip code/postal code (primary residence): \_\_\_ \_\_\_ \_\_\_ \_\_\_

2.7 Insurance:

 Private  
 Self-pay  
 U.S. Government (e.g. Medicaid)  
 Unknown

**eTable 1.** Multipliers Used to Estimate Number of SARS-CoV-2 Infections Based on Reported Persons

With COVID-19

Adapted from Reese et al. 2020<sup>8</sup>

| <b>Month</b>           | <b>Age Group</b> | <b>Multiplier<br/>(95% Confidence Interval)</b> |
|------------------------|------------------|-------------------------------------------------|
| <b>March</b>           | ≤5 Years         | 191.0 (95.2–412.3)                              |
|                        | 6–10 Years       | 222.6 (109.9–484.0)                             |
|                        | 11–15 Years      | 222.6 (109.9–484.0)                             |
|                        | 16–20 Years      | 32.2 (18.1–65.6)                                |
| <b>April &amp; May</b> | ≤5 Years         | 15.7 (9.8–26.6)                                 |
|                        | 6–10 Years       | 16.4 (10.1–27.9)                                |
|                        | 11–15 Years      | 16.4 (10.1–27.9)                                |
|                        | 16–20 Years      | 7.1 (5.0–10.1)                                  |



**eFigure 1.** Distribution of Reported Persons With COVID-19 in Select Jurisdictions by Month During March to May 2020

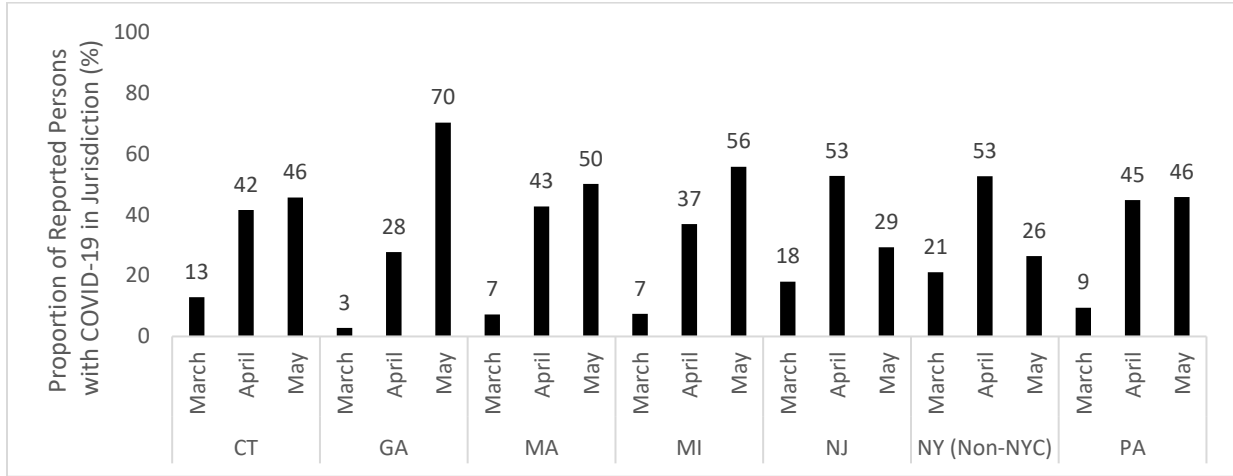

Abbreviations: CT, Connecticut; GA, Georgia; MA, Massachusetts; MI, Michigan; NJ, New Jersey; NY (Non-NYC), New York (Non-New York City); PA, Pennsylvania

**eFigure 2.** Distribution of Reported Persons With MIS-C in Jurisdictions by Select Characteristics During April to June 2020

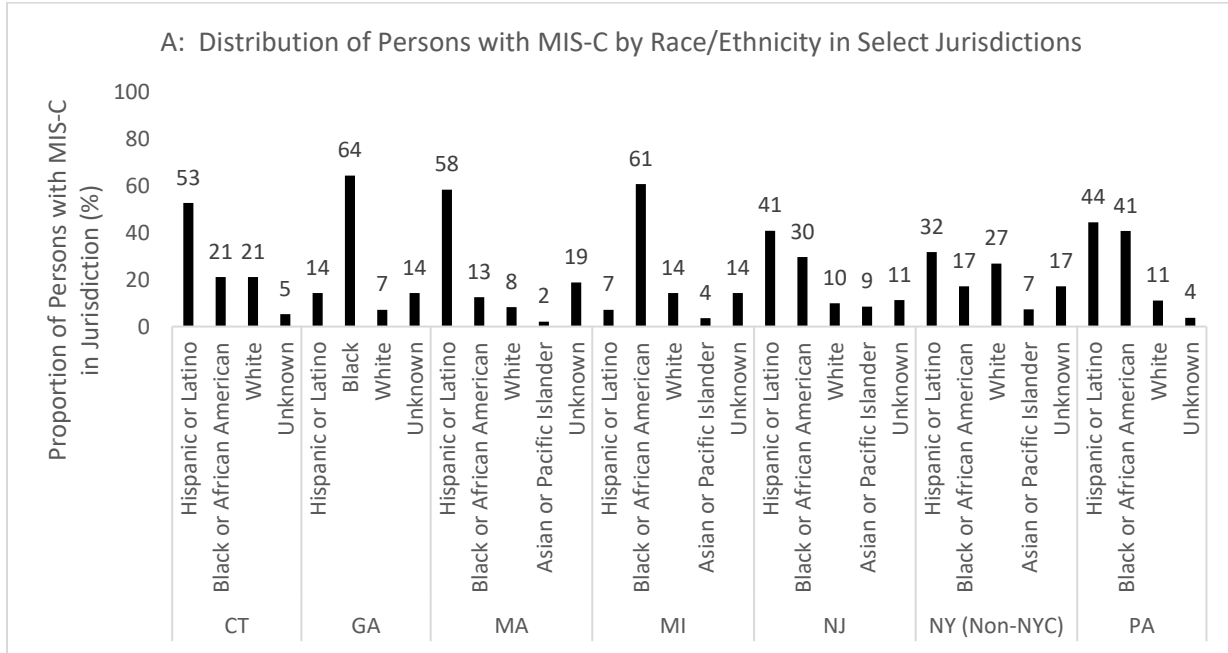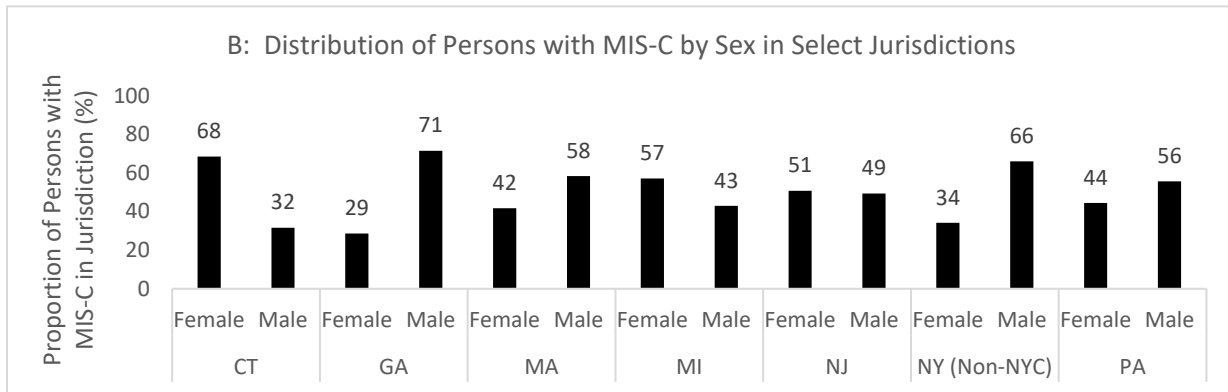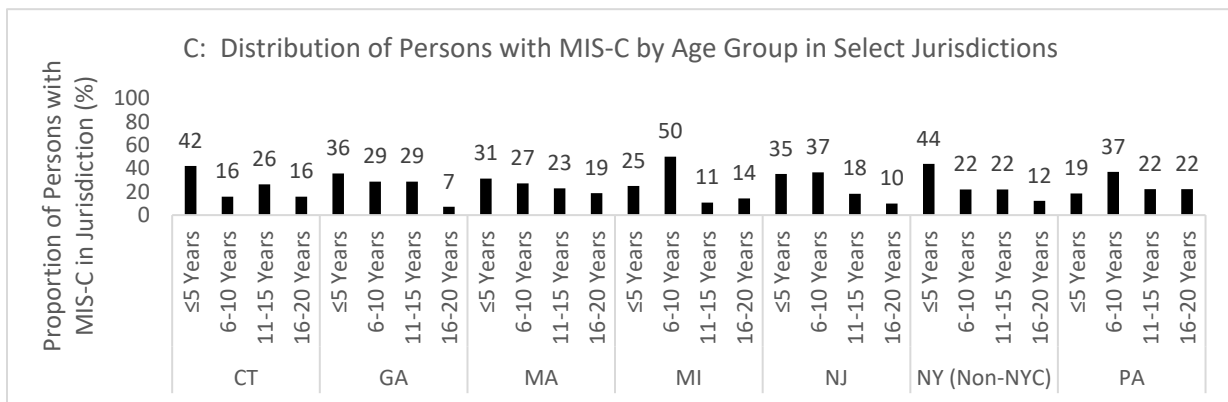

Abbreviations: CT, Connecticut; GA, Georgia; MA, Massachusetts; MI, Michigan; NJ, New Jersey; NY (Non-NYC), New York (Non-New York City); PA, Pennsylvania

**eTable 2.** Range of Stratum-Specific Estimates of Incidence of MIS-C Per 1 000 000 SARS-CoV-2 Infections in Select Jurisdictions by Jurisdiction, Race/Ethnicity, Sex, and Age Group During April to June 2020

|                                   | <b>Adjusted<sup>A</sup><br/>MIS-C Incidence<br/>per million<br/>persons with reported<br/>COVID-19<sup>B</sup><br/>(95% CI<sup>C</sup>)</b> | <b>Adjusted<sup>A</sup><br/>MIS-C Incidence<br/>per million<br/>SARS-CoV-2<sup>B,D</sup><br/>Infections<br/>(95% CI<sup>B</sup>CI<sup>C</sup>)<br/>(Low<sup>E</sup>)</b> | <b>Adjusted<sup>A</sup><br/>MIS-C Incidence<br/>per million<br/>SARS-CoV-2<sup>B,D</sup><br/>Infections<br/>(95% CI<sup>C</sup>)<br/>(Mid<sup>F</sup>)</b> | <b>Adjusted<sup>A,G,H</sup><br/>MIS-C Incidence<br/>per million<br/>SARS-CoV-2<sup>B,D</sup><br/>Infections<br/>(95% CI<sup>C</sup>)<br/>(High<sup>I</sup>)</b> |
|-----------------------------------|---------------------------------------------------------------------------------------------------------------------------------------------|--------------------------------------------------------------------------------------------------------------------------------------------------------------------------|------------------------------------------------------------------------------------------------------------------------------------------------------------|-----------------------------------------------------------------------------------------------------------------------------------------------------------------|
| <b>Jurisdiction</b>               |                                                                                                                                             |                                                                                                                                                                          |                                                                                                                                                            |                                                                                                                                                                 |
| Connecticut                       | 8,807 (5,397–14,371)                                                                                                                        | 191 (117–312)                                                                                                                                                            | 358 (219–585)                                                                                                                                              | 625 (383–1,020)                                                                                                                                                 |
| Georgia                           | 4,014 (2,223–7,246)                                                                                                                         | 142 (78–256)                                                                                                                                                             | 246 (136–444)                                                                                                                                              | 402 (222–727)                                                                                                                                                   |
| Massachusetts                     | 6,812 (4,805–9,658)                                                                                                                         | 194 (137–276)                                                                                                                                                            | 352 (248–498)                                                                                                                                              | 593 (419–840)                                                                                                                                                   |
| Michigan                          | 12,762 (8,319–19,578)                                                                                                                       | 345 (223–534)                                                                                                                                                            | 627 (405–969)                                                                                                                                              | 1,063 (689–1,641)                                                                                                                                               |
| New Jersey <sup>J</sup>           | 11,087 (8,342–14,735)                                                                                                                       | 169 (126–226)                                                                                                                                                            | 331 (248–443)                                                                                                                                              | 599 (448–800)                                                                                                                                                   |
| New York (Non-New York City)      | 5,371 (3,743–7,708)                                                                                                                         | 70 (48–100)                                                                                                                                                              | 138 (96–198)                                                                                                                                               | 252 (175–362)                                                                                                                                                   |
| Pennsylvania                      | 7,661 (5,052–11,616)                                                                                                                        | 193 (127–293)                                                                                                                                                            | 355 (234–540)                                                                                                                                              | 608 (400–923)                                                                                                                                                   |
| <b>Race/Ethnicity<sup>G</sup></b> |                                                                                                                                             |                                                                                                                                                                          |                                                                                                                                                            |                                                                                                                                                                 |
| White                             | 2,910 (2,040–4,152)                                                                                                                         | 58 (41–83)                                                                                                                                                               | 110 (77–156)                                                                                                                                               | 192 (135–274)                                                                                                                                                   |
| Black or African American         | 15,380 (12,093–19,561)                                                                                                                      | 329 (257–422)                                                                                                                                                            | 616 (481–790)                                                                                                                                              | 1,073 (839–1,372)                                                                                                                                               |
| Hispanic or Latino                | 9,947 (7,935–12,470)                                                                                                                        | 257 (204–324)                                                                                                                                                            | 467 (371–588)                                                                                                                                              | 794 (631–999)                                                                                                                                                   |
| Asian or Pacific Islander         | 7,309 (3,982–13,414)                                                                                                                        | 170 (91–319)                                                                                                                                                             | 315 (169–589)                                                                                                                                              | 544 (292–1,012)                                                                                                                                                 |
| <b>Sex<sup>H</sup></b>            |                                                                                                                                             |                                                                                                                                                                          |                                                                                                                                                            |                                                                                                                                                                 |
| Female                            | 7,252 (5,630–9,342)                                                                                                                         | 167 (129–215)                                                                                                                                                            | 309 (240–399)                                                                                                                                              | 533 (414–688)                                                                                                                                                   |
| Male                              | 7,866 (6,160–10,044)                                                                                                                        | 173 (135–222)                                                                                                                                                            | 323 (252–413)                                                                                                                                              | 559 (437–716)                                                                                                                                                   |
| <b>Age Group</b>                  |                                                                                                                                             |                                                                                                                                                                          |                                                                                                                                                            |                                                                                                                                                                 |
| <6 years                          | 14,292 (10,782–18,944)                                                                                                                      | 229 (172–305)                                                                                                                                                            | 444 (333–591)                                                                                                                                              | 798 (600–1,061)                                                                                                                                                 |
| 6–10 Years                        | 19,624 (14,892–25,859)                                                                                                                      | 318 (240–420)                                                                                                                                                            | 613 (464–811)                                                                                                                                              | 1,105 (836–1,460)                                                                                                                                               |
| 11–15 Years                       | 7,293 (5,236–10,159)                                                                                                                        | 116 (83–161)                                                                                                                                                             | 224 (160–312)                                                                                                                                              | 404 (289–563)                                                                                                                                                   |
| 16–20 Years                       | 1,591 (1,071–2,363)                                                                                                                         | 99 (67–148)                                                                                                                                                              | 164 (110–243)                                                                                                                                              | 250 (169–372)                                                                                                                                                   |

<sup>A</sup>Adjusted using Poisson regression, with jurisdiction, race/ethnicity, sex, and age group in the model

<sup>B</sup>Reflects estimate after imputation of race/ethnicity for N=16,129 persons with COVID-19 reported from jurisdictions

<sup>C</sup>CI: confidence interval

<sup>D</sup>SARS-CoV-2 infections estimated by applying age- and month-specific multipliers<sup>8</sup> to reported COVID-19 case counts

<sup>E</sup>'Low' incidence estimate corresponds to use of upper bound of confidence interval around multiplier estimate

<sup>F</sup>'Mid' incidence estimate corresponds to use of point estimate for multiplier

<sup>G</sup>N = 32 persons with MIS-C with other/unknown race/ethnicity excluded from analyses involving race/ethnicity, including adjusted estimates

<sup>H</sup>N = 188 reported persons with COVID-19 with other/unknown sex excluded from analyses involving sex, including adjusted estimates

<sup>I</sup>'High' incidence estimate corresponds to use of lower bound of confidence interval around multiplier estimate

<sup>J</sup>NJ suppressed stratum-specific reported COVID-19 case counts of <5; these were assumed to be 1 for analysis

Abbreviations: MIS-C: multisystem Inflammatory Syndrome in Children; SARS-CoV-2: severe acute respiratory syndrome coronavirus 2
